# Supplementary material for: PKN1 Exerts Neurodegenerative Effects in an In Vitro Model of Cerebellar Hypoxic–Ischemic Encephalopathy via Inhibition of AKT/GSK3β Signaling
Source: MDPI journal article supplement (doi:10.3390/biom13111599), 2023-10-31
Supplement: s1 [file s1]

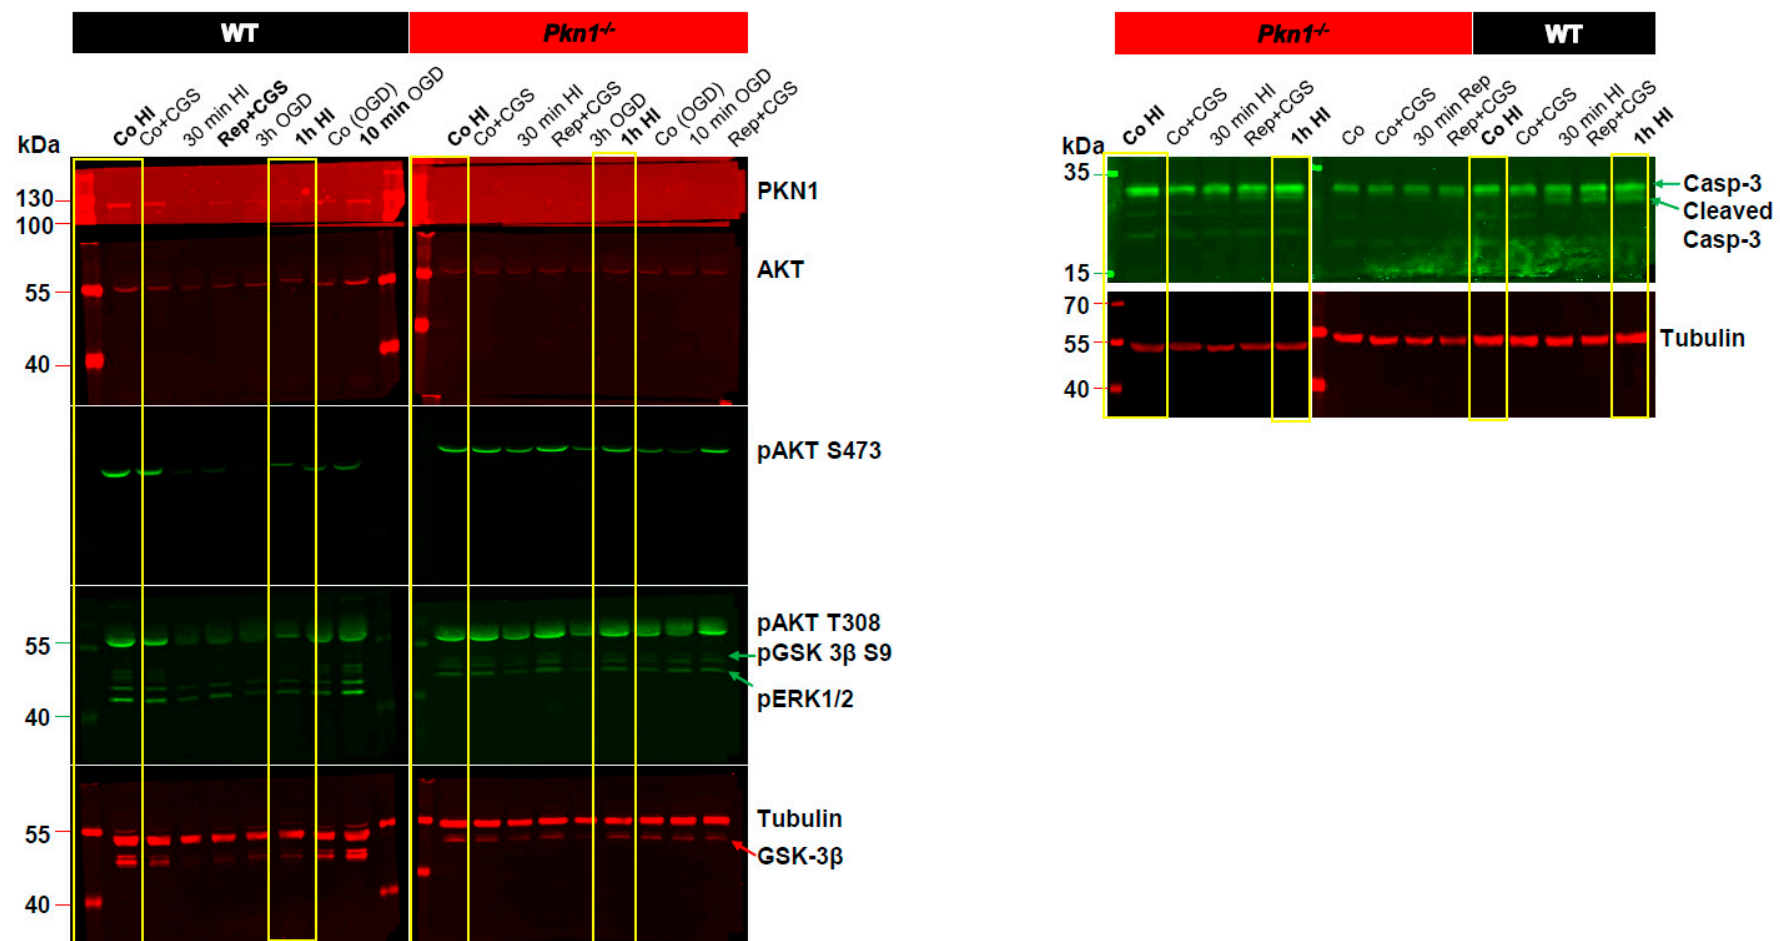

Figure S1. Uncropped blots from Figure 1a. Lanes taken for the show blot are shown in yellow.

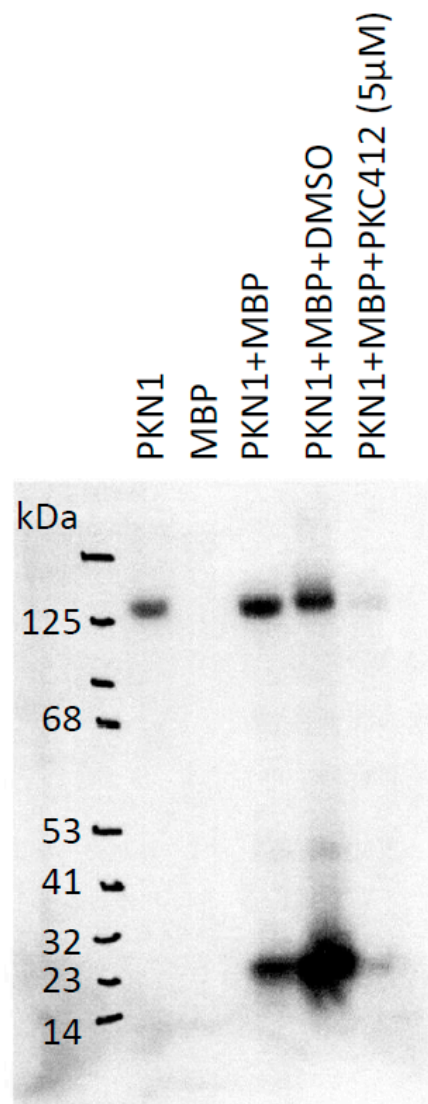

**Figure S2.** Uncropped Blot from Figure 3a.

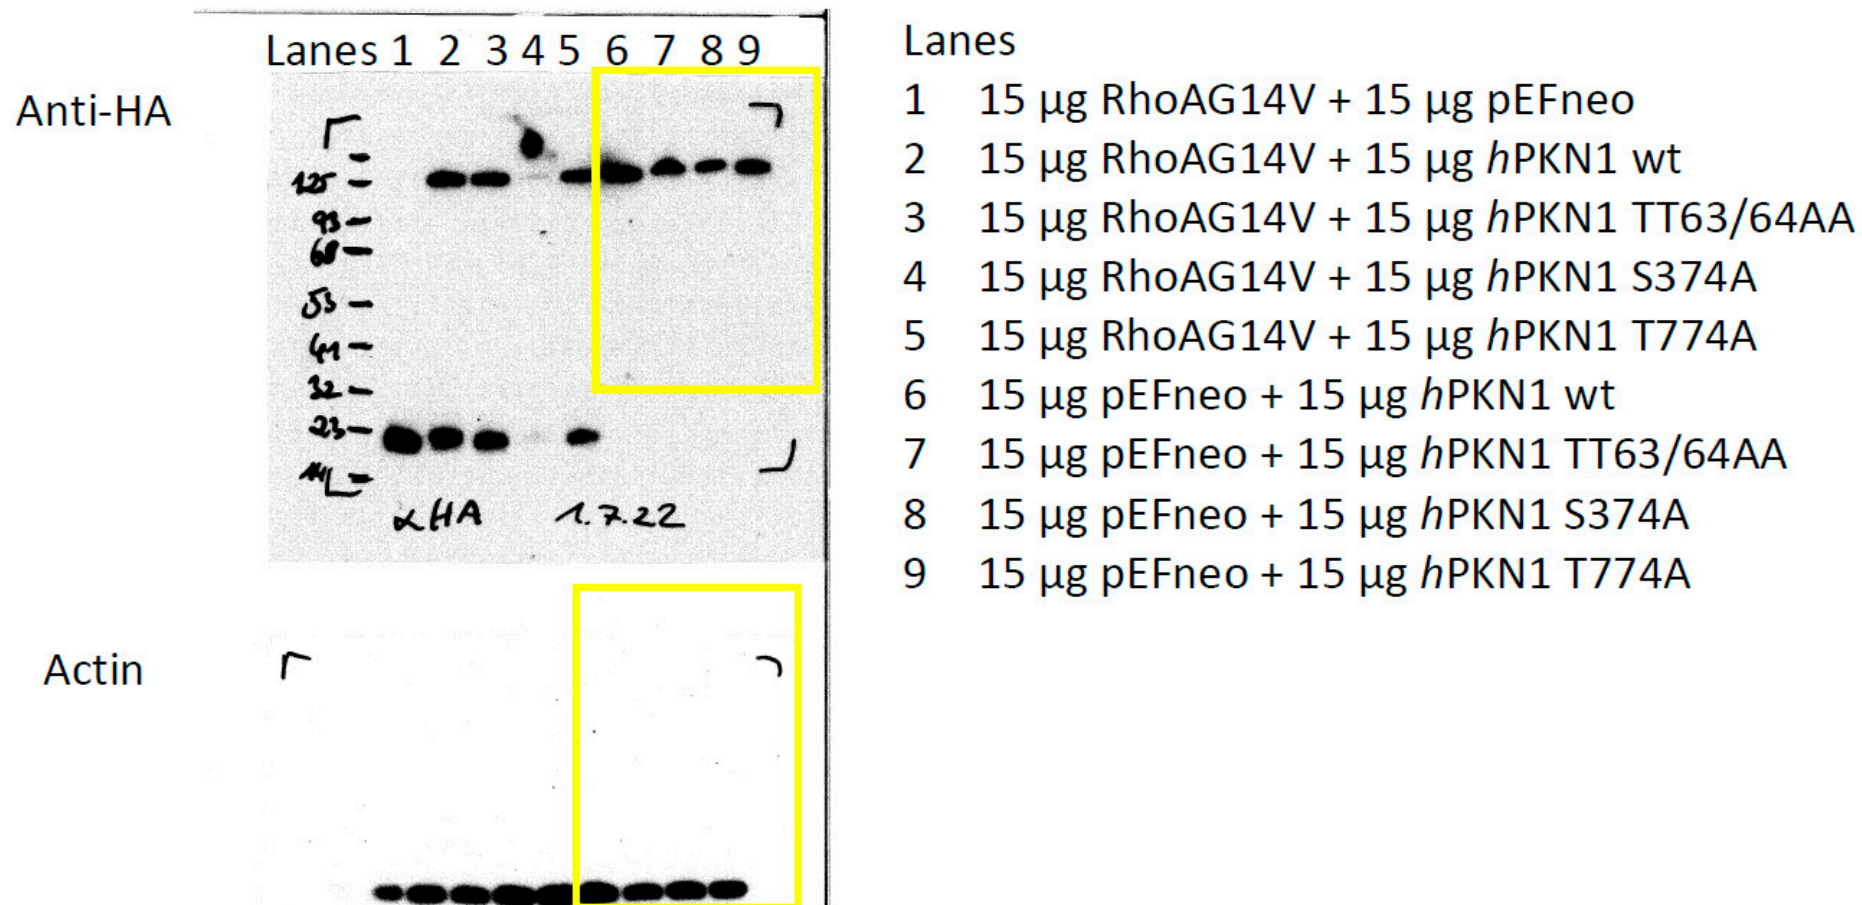

Figure S3. Uncropped blots from Figure 4a. Lanes taken for the show blot are shown in yellow.

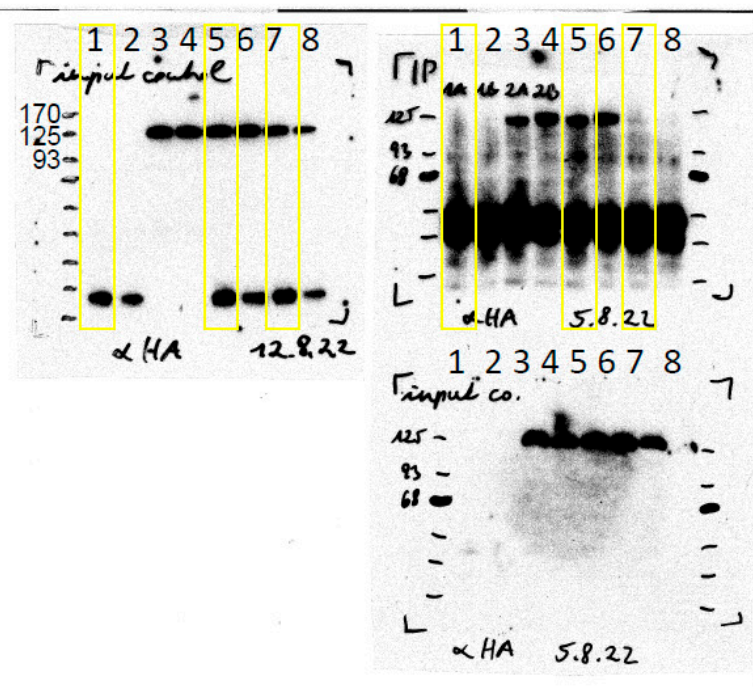

Lanes

- 1 15  $\mu$ g RhoAG14V + 15  $\mu$ g pEFneo (control)
- 2 15  $\mu$ g RhoAG14V + 15  $\mu$ g pEFneo (PdBu/Ionomycin)
- 3 15  $\mu$ g pEFneo + 15  $\mu$ g *hPKN1* wt(control)
- 4 15  $\mu$ g pEFneo + 15  $\mu$ g *hPKN1* wt(PdBu/Ionomycin)
- 5 15  $\mu$ g RhoAG14V + 15  $\mu$ g *hPKN1* wt(control)
- 6 15  $\mu$ g RhoAG14V + 15  $\mu$ g *hPKN1* wt(PdBu/Ionomycin)
- 7 15  $\mu$ g RhoAG14V + 15  $\mu$ g *hPKN1* S374A(control)
- 8 15  $\mu$ g RhoAG14V + 15  $\mu$ g *hPKN1* S374A(PdBu/Ionomycin)

**Figure S4.** Uncropped blots from Figure 5a. Lanes taken for the show blot are shown in yellow.

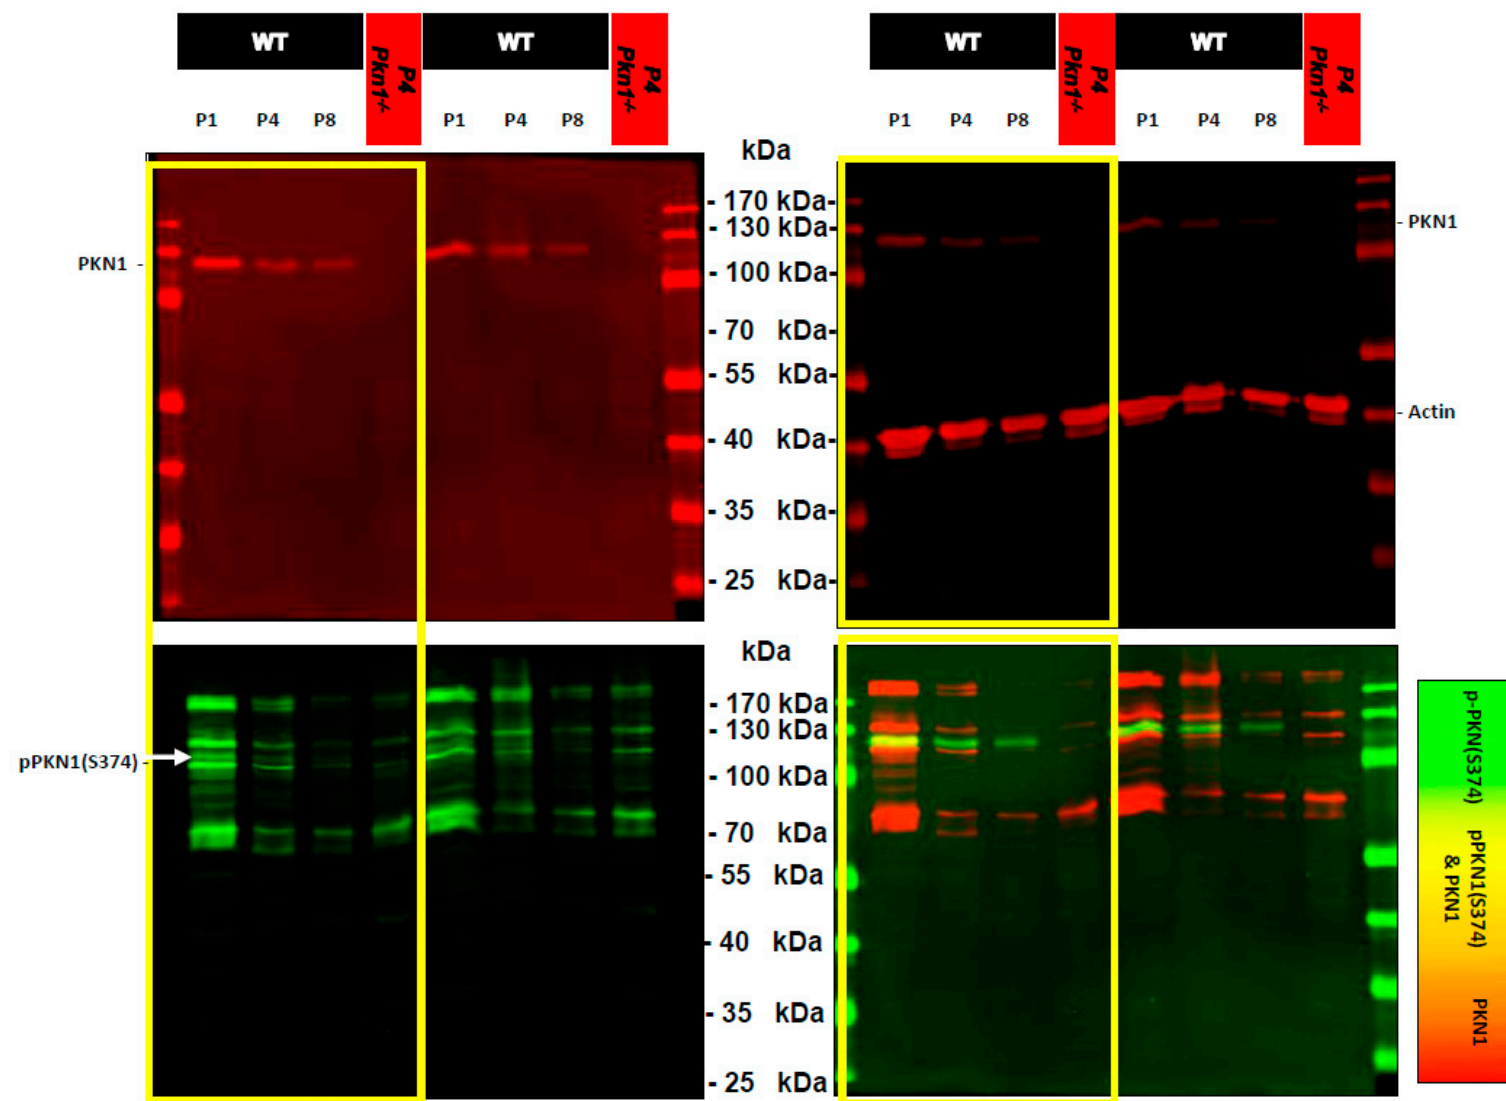

**Figure S5.** Uncropped blots from Figure 5b. Lanes taken for the show blot are shown in yellow.



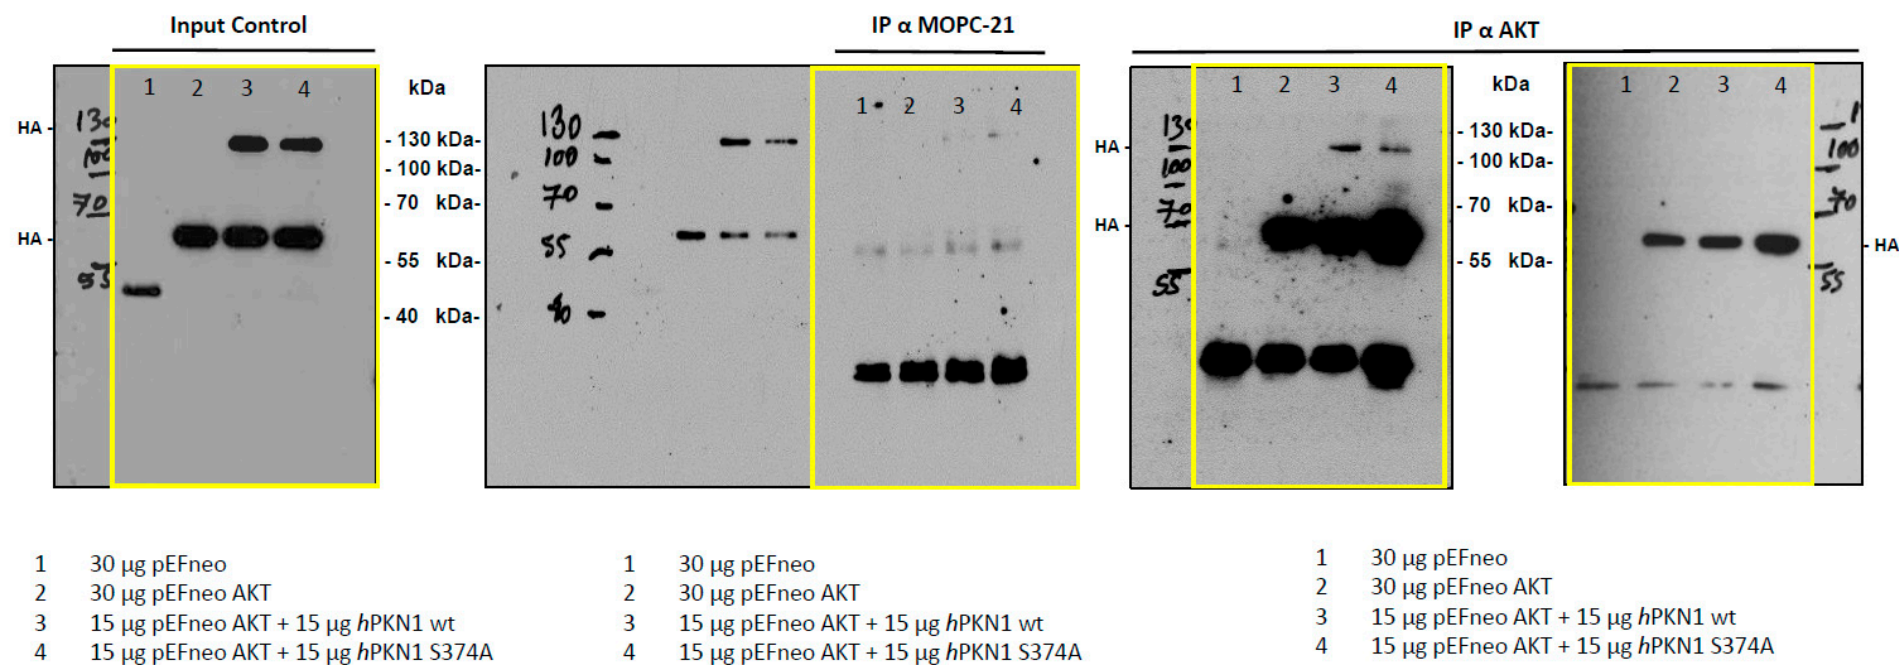

**Figure S6.** Uncropped blots from Figure 6a. Lanes taken for the show blot are shown in yellow.
